# Supplementary material for: Colloidal fluorine-doped ZnO quantum dots: the synergistic action of atomic doping and growth conditions directs fluorescence and photoactivity
Source: Royal Society of Chemistry journal article supplement (doi:10.1039/d4qm00655k), 2024-01-01
Supplement: d4qm00655k1.pdf [file d4qm00655k1.pdf]

## Supporting Information

# Colloidal fluorine-doped ZnO quantum dots: the synergistic action of atomic doping and growth conditions directs fluorescence and photoactivity

Noemi Gallucci<sup>1,2</sup>, Alessandro Cangiano<sup>1,2</sup>, Simone Russo<sup>3</sup>, Giulio Pota<sup>3</sup>, Rocco Di Girolamo<sup>1</sup>, Eugénie Martinez<sup>4</sup>, Nicolas Vaxelaire<sup>4</sup>, Luigi Paduano<sup>1,2</sup> and Giuseppe Vitiello<sup>2,3\*</sup>

<sup>1</sup> Department of Chemical Sciences, University of Naples Federico II, Via Cintia 4, 80126 Naples, Italy.

<sup>2</sup> CSGI -Center for Colloid and Surface Science, Via della Lastruccia 3, 50019 Sesto Fiorentino, Italy.

<sup>3</sup> Department of Chemical, Materials and Production Engineering, University of Naples Federico II, P.le Tecchio 80, 80125 Naples, Italy.

<sup>4</sup> University of Grenoble Alpes, CEA-LETI, 17 Av. des Martyrs, 38054 Grenoble, France.

\*Corresponding author: Giuseppe Vitiello, email: [giuseppe.vitiello@unina.it](mailto:giuseppe.vitiello@unina.it)

**Table S1.** Amounts of reagents used in the synthesis of bare and doped ZnO-QDs under wet conditions.

| Sample        | ZAD ±<br>0.0001<br>g | MeOH for ZAD ±<br>0.0001<br>g | KOH ±<br>0.0001<br>g | MeOH for KOH ±<br>0.0001<br>G | NH <sub>4</sub> HF <sub>2</sub> ±<br>0.0001<br>g |
|---------------|----------------------|-------------------------------|----------------------|-------------------------------|--------------------------------------------------|
| F0/ZnO-QDs    | 1.2342               | 39.8270                       | 0.6038               | 27.7106                       |                                                  |
| F1/ZnO-QDs    | 2.6402               | 83.9602                       | 1.3202               | 47.3301                       | 0.0034                                           |
| F2.5//ZnO-QDs | 2.6402               | 83.9602                       | 1.3202               | 47.3301                       | 0.0085                                           |
| F5//ZnO-QDs   | 2.6402               | 83.9602                       | 1.3202               | 47.3301                       | 0.0171                                           |
| F7.5//ZnO-QDs | 2.6402               | 83.9602                       | 1.3202               | 47.3301                       | 0.0256                                           |
| F10//ZnO-QDs  | 2.6398               | 83.9605                       | 1.3202               | 47.3298                       | 0.0342                                           |
| F15//ZnO-QDs  | 2.6401               | 83.9598                       | 1.3201               | 47.3302                       | 0.0513                                           |
| F20//ZnO-QDs  | 2.6402               | 83.9960                       | 1.3198               | 47.3301                       | 0.0684                                           |

**Table S2.** Doping salt content used for the synthesis of ZnO-NCs under solvothermal conditions.

| Sample       | $\text{NH}_4\text{HF}_2 \pm 0.00001$<br>g |
|--------------|-------------------------------------------|
| F0/ZnO-NCs   |                                           |
| F1/ZnO-NCs   | 0.00068                                   |
| F2.5/ZnO-NCs | 0.00171                                   |
| F5/ZnO-NCs   | 0.00342                                   |
| F7.5/ZnO-NCs | 0.00513                                   |
| F10/ZnO-NCs  | 0.00684                                   |
| F15/ZnO-NCs  | 0.01026                                   |
| F20/ZnO-NCs  | 0.01368                                   |

**Table S3.** Average dimension obtained from the statistical analysis of TEM images and hydrodynamic radius of colloidal nanosystems obtained from DLS analysis for undoped and F-doped ZnO as synthesized through the wet-precipitation method (QDs) and solvothermal method (NCs).

| Sample                             | $\langle R \rangle$ / nm | $\langle L \rangle$ / nm | $R_h$ / nm                    |
|------------------------------------|--------------------------|--------------------------|-------------------------------|
| <i>wet-precipitation synthesis</i> |                          |                          |                               |
| F0/ZnO-QDs                         | $3 \pm 1$                |                          | $25 \pm 3$                    |
| F1/ZnO-QDs                         | $2.5 \pm 0.3$            |                          | $40 \pm 2$                    |
| F2.5/ZnO-QDs                       | $3 \pm 1$                |                          | $45 \pm 10$                   |
| F5/ZnO-QDs                         | $3.0 \pm 0.8$            |                          | $50 \pm 10$                   |
| F7.5/ZnO-QDs                       | $3.5 \pm 0.1$            |                          | $50 \pm 3$                    |
| F10/ZnO-QDs                        | $3.4 \pm 0.6$            |                          | $28 \pm 1$                    |
| F15/ZnO-QDs                        | $2.7 \pm 0.5$            |                          | $27 \pm 1$                    |
| F20/ZnO-QDs                        | $3.3 \pm 0.6$            |                          | $62 \pm 4$                    |
| <i>solvothermal synthesis</i>      |                          |                          |                               |
| F0/ZnO-NCs                         |                          | $50 \pm 30$              | $100 \pm 40$ and $600 \pm 90$ |
| F1/ZnO-NCs                         | $28 \pm 6$               |                          | $73 \pm 3$                    |
| F2.5/ZnO-NCs                       | $11 \pm 2$               |                          | $80 \pm 3$                    |
| F5/ZnO-NCs                         | $11 \pm 2$               |                          | $125 \pm 15$                  |
| F7.5/ZnO-NCs                       | $12 \pm 3$               |                          | $100 \pm 5$                   |
| F10/ZnO-NCs                        |                          | $26 \pm 7$               | $200 \pm 30$                  |
| F15/ZnO-NCs                        |                          | $30 \pm 5$               | $300 \pm 20$                  |
| F20/ZnO-NCs                        | $50 \pm 10$              |                          | $270 \pm 40$                  |

**Table S4.** Experimental values of the diffraction angles ( $2\theta$ , deg), corresponding Miller indices ( $hkl$ ), and the cell dimensions of diffraction peaks.

| Sample       | (100)  | (002)  | (101)  | (102)  | (110)  | (103)  | (200)  | (112)  | (201)  | $a/\text{\AA}$ | $b/\text{\AA}$ | $c/\text{\AA}$ | $\alpha/^\circ$ | $\beta/^\circ$ | $\gamma/^\circ$ |
|--------------|--------|--------|--------|--------|--------|--------|--------|--------|--------|----------------|----------------|----------------|-----------------|----------------|-----------------|
| F0/ZnO-QDs   | 31.56° | 34.16° | 36.21° | 47.31° | 56.43° | 62.80° | 66.43° | 67.85° | 68.86° | 3.52           | 3.52           | 5.21           | 89.93           | 89.91          | 119.99          |
| F1/ZnO-QDs   | 31.56° | 34.07° | 36.21° | 47.22° | 56.43° | 62.80° | 66.27° | 67.85° | 69.03° | 3.27           | 3.28           | 5.21           | 90.70           | 89.49          | 120.66          |
| F2.5/ZnO-QDs | 31.64° | 34.32° | 36.21° | 47.30° | 56.50° | 62.80° | 66.35° | 67.77° | 69.03° | 3.26           | 3.28           | 5.21           | 90.77           | 89.64          | 120.77          |
| F5/ZnO-QDs   | 31.54° | 34.32° | 36.05° | 47.22° | 56.59° | 62.80° | 66.43° | 67.85° | 69.11° | 3.25           | 3.27           | 5.21           | 90.67           | 89.30          | 120.33          |
| F7.5/ZnO-QDs | 31.54° | 34.24° | 36.13° | 47.28° | 56.51° | 62.80° | 66.43° | 67.85° | 69.11° | 3.24           | 3.27           | 5.20           | 90.48           | 89.58          | 120.05          |
| F10/ZnO-QDs  | 31.64° | 34.32° | 36.30° | 47.28° | 56.59° | 62.80° | 66.35° | 67.92° | 69.11° | 3.25           | 3.24           | 5.20           | 89.81           | 90.12          | 119.93          |
| F15/ZnO-QDs  | 31.54° | 34.32° | 36.21° | 47.30° | 56.51° | 62.80° | 66.51° | 67.92° | 69.11° | 3.25           | 3.25           | 5.20           | 90.07           | 89.90          | 120.16          |
| F20/ZnO-QDs  | 31.72° | 34.32° | 36.29° | 47.28° | 56.59° | 62.88° | 66.43° | 67.92° | 69.11° | 3.25           | 3.25           | 5.20           | 90.01           | 90.04          | 120.05          |
| F0/ZnO-NCs   | 31.63° | 34.30° | 36.13° | 47.48° | 56.48° | 62.82° | 66.09° | 67.84° | 68.99° | 3.24           | 3.25           | 5.20           | 89.97           | 89.93          | 119.79          |
| F1/ZnO-NCs   | 31.70° | 34.30° | 36.20° | 47.56° | 56.48° | 62.74° | 66.32° | 67.84° | 68.99° | 3.25           | 3.25           | 5.21           | 89.98           | 89.91          | 119.94          |
| F2.5/ZnO-NCs | 31.63° | 34.38° | 36.20° | 47.56° | 56.48° | 62.83° | 66.17° | 67.77° | 69.07° | 3.26           | 3.26           | 5.21           | 89.99           | 89.63          | 120.38          |
| F5/ZnO-NCs   | 31.70° | 34.38° | 36.20° | 47.42° | 56.57° | 62.88° | 66.20° | 67.92° | 68.99° | 3.25           | 3.25           | 5.21           | 89.93           | 89.91          | 119.99          |
| F7.5/ZnO-NCs | 31.63° | 34.38° | 36.20° | 47.56° | 56.57° | 62.81° | 66.24° | 67.84° | 68.91° | 3.25           | 3.25           | 5.21           | 90.09           | 89.90          | 120.02          |
| F10/ZnO-NCs  | 31.71° | 34.38° | 36.20° | 47.48° | 56.57° | 62.82° | 66.55° | 67.92° | 69.07° | 3.26           | 3.26           | 5.22           | 88.87           | 90.69          | 120.21          |
| F15/ZnO-NCs  | 31.71° | 34.45° | 36.27° | 47.56° | 56.57° | 62.89° | 66.55° | 67.84° | 69.99° | 3.25           | 3.25           | 5.21           | 89.99           | 90.00          | 120.01          |
| F20/ZnO-NCs  | 31.63° | 34.53° | 36.28° | 47.44° | 56.48° | 62.97° | 67.09° | 67.92° | 69.22° | 3.25           | 3.25           | 5.21           | 89.99           | 90.00          | 120.03          |

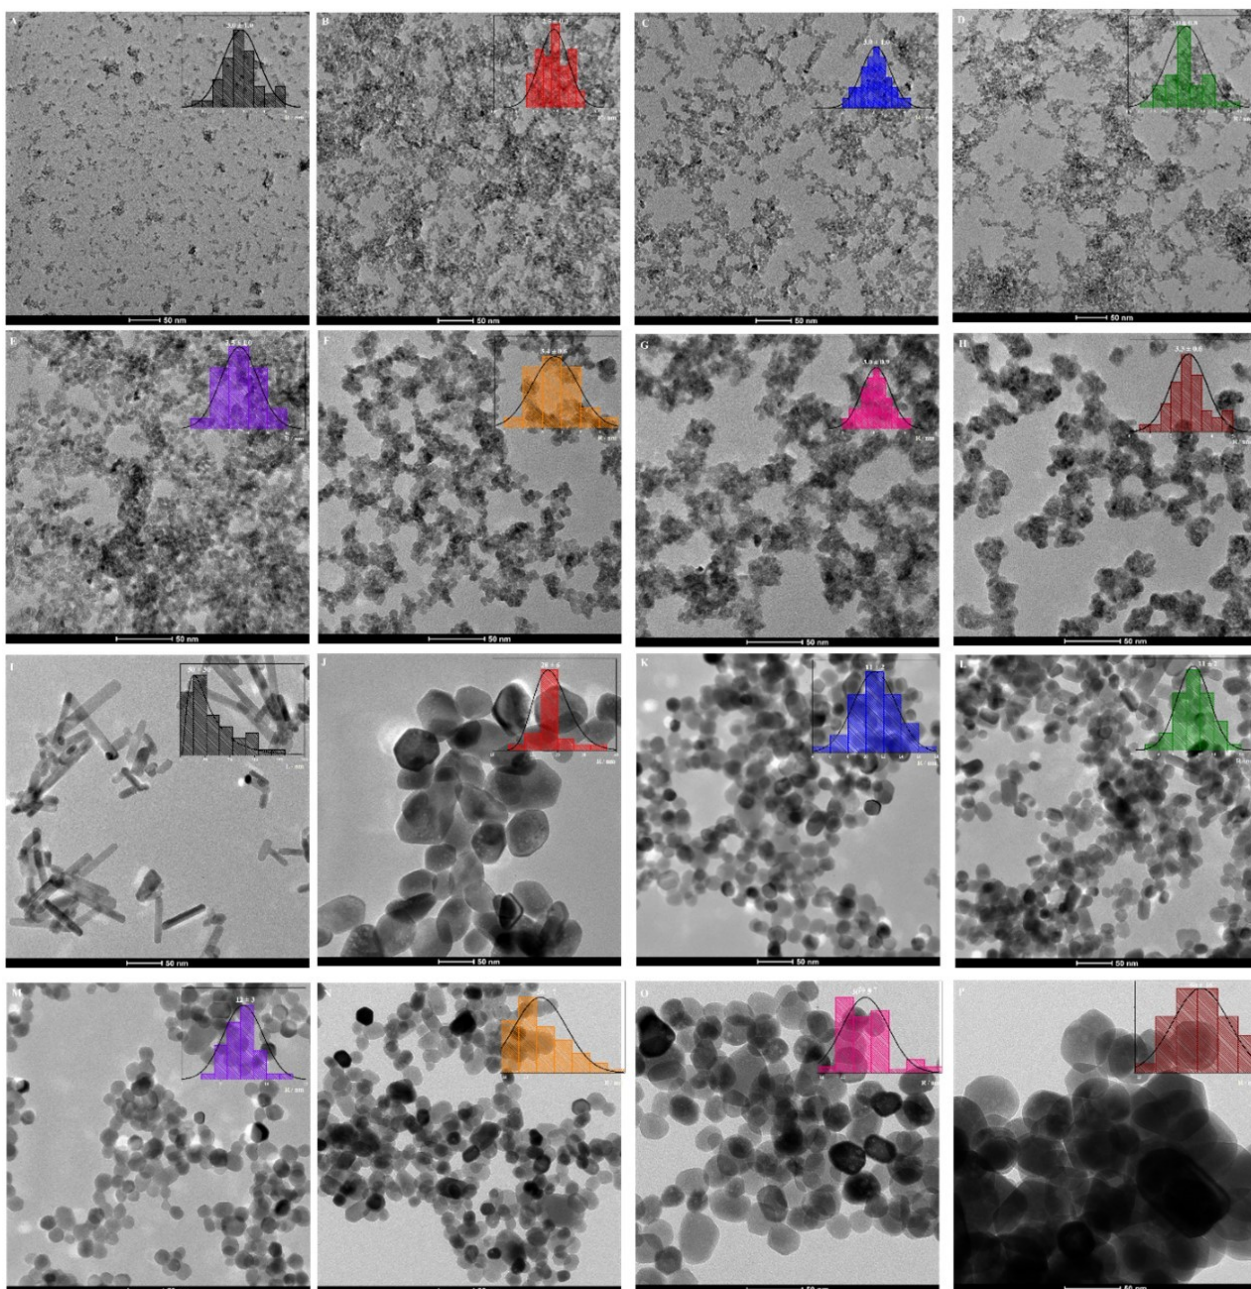

**Figure S1.** TEM images of undoped and F-doped ZnO were obtained through the two synthetic approaches: F0/ZnO-QDs (A), F1/ZnO-QDs (B), F2.5/ZnO-QDs (C), F5/ZnO-QDs (D), F7.5/ZnO-QDs (E), F10/ZnO-QDs (F), F15/ZnO-QDs (G), F20/ZnO-QDs (H), F0/ZnO-NCs (I), F2.5/ZnO-NCs (K), F5/ZnO-NCs (L), F7.5/ZnO-NCs (M), F10/ZnO-NCs (N), F15/ZnO-NCs (O) and F20/ZnO-NCs (P) (scalebar: 50 nm).

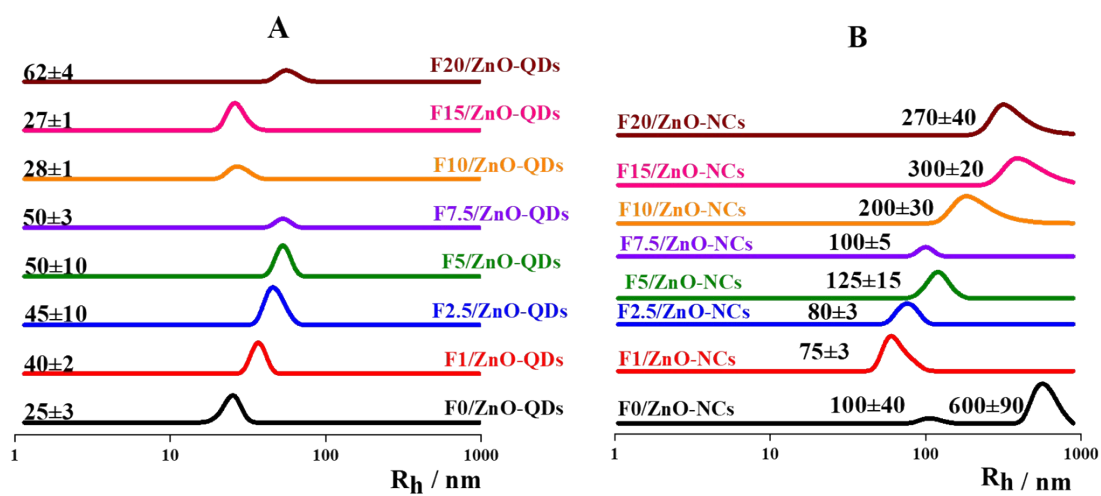

**Figure S2.** Hydrodynamic radius distribution of F/ZnO-QDs as synthesized through the wet method (in methanol, panel A) and through the solvothermal method (in ethanol, panel B).

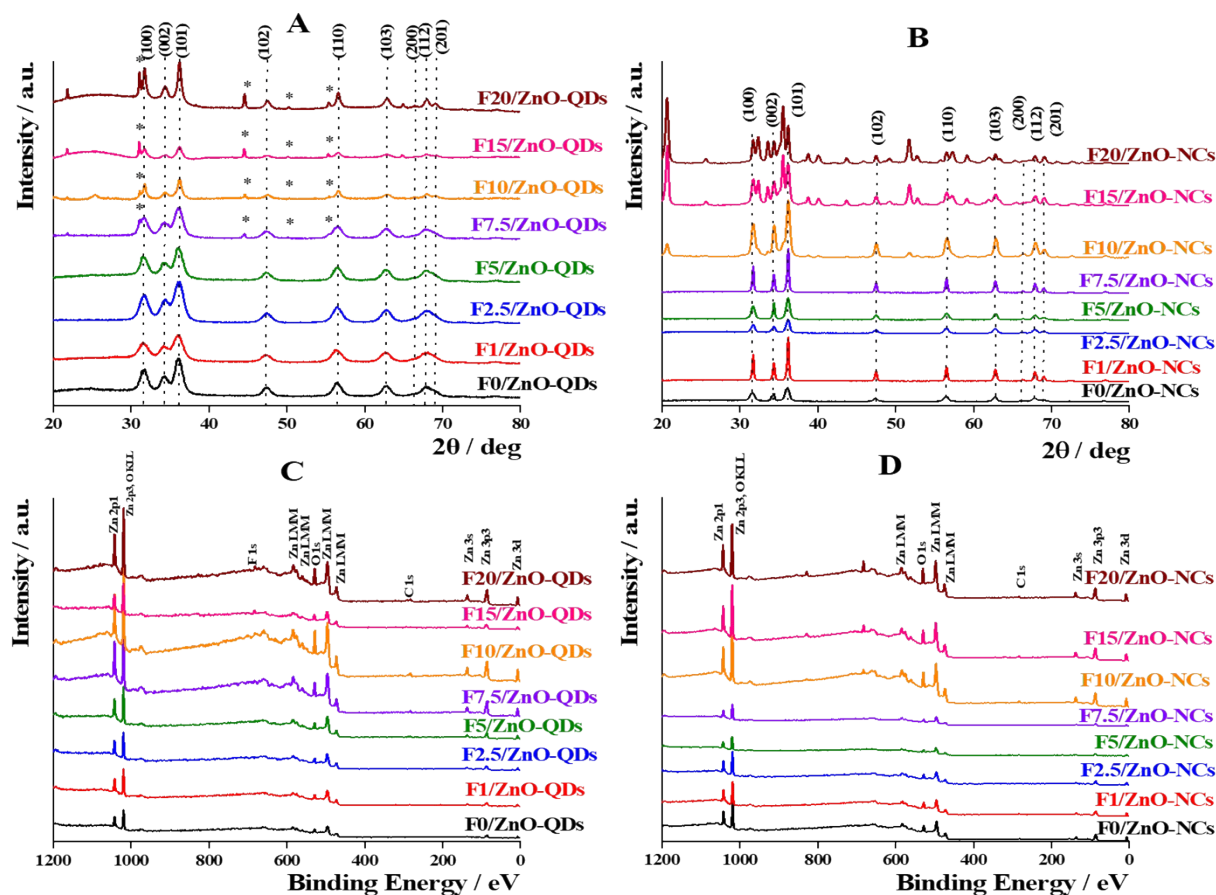

**Figure S3.** XRD patterns of undoped and F-doped ZnO-QDs as synthesized through the wet method (panel A) and of undoped and F-doped ZnO-NCs as synthesized through the solvothermal method (panel B). Dot lines indicate ZnO peaks, while stars indicate the ZnF<sub>2</sub> ones; and XPS patterns of undoped and F-doped ZnO-QDs as synthesized through the wet method (panel C) and undoped and F-doped ZnO-NCs as synthesized through the solvothermal method (panel D).



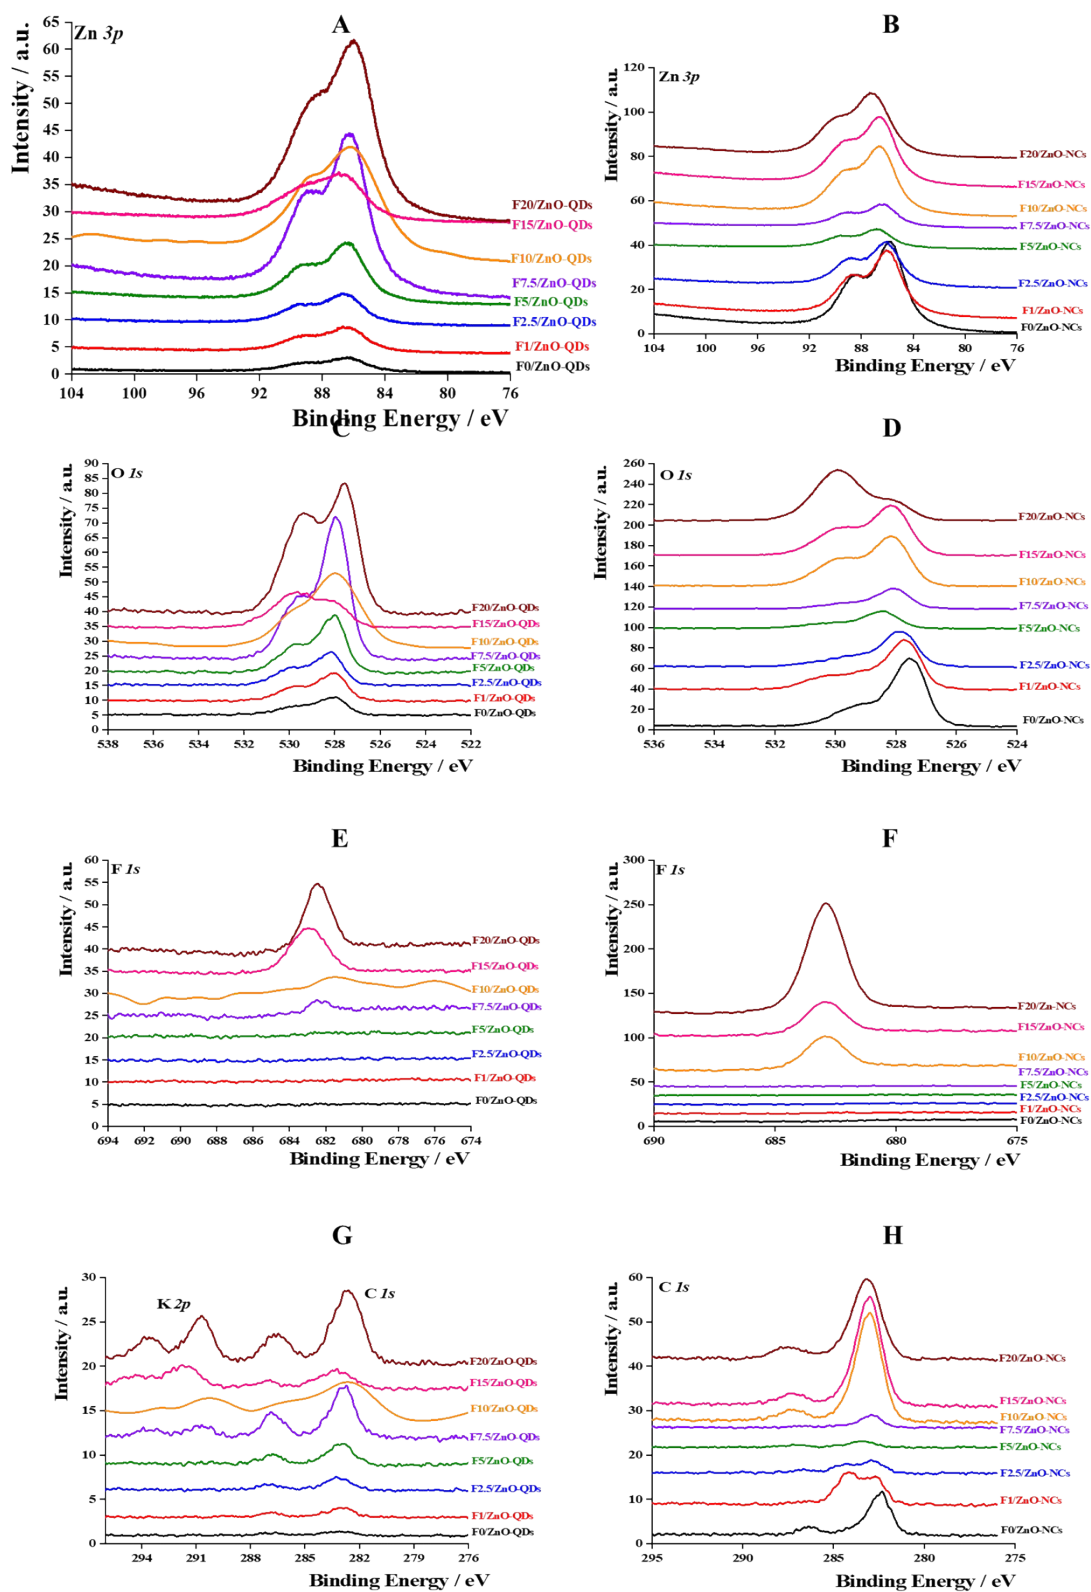

**Figure S4.** Zn 3p (A, B), O 1s (C, D), F 1s (E, F), and C 1s (G, H) XPS spectra of undoped and F-doped ZnO-QDs as synthesized through the wet method (column on the left) and the solvothermal method (column on the right).

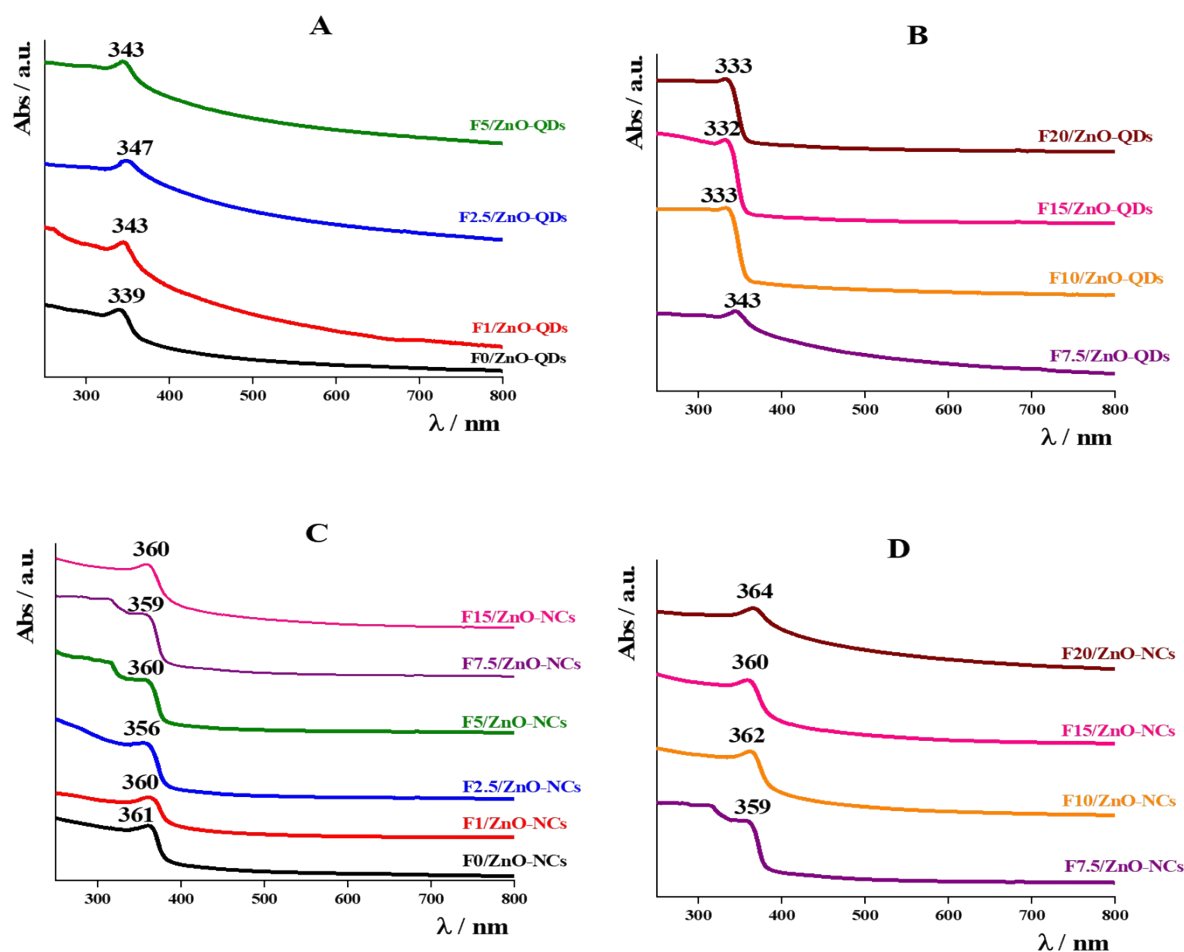

**Figure S5.** UV-visible spectra of undoped and F-doped ZnO-QDs as synthesized through the wet method (panels A and B) and the solvothermal method (panels C and D).



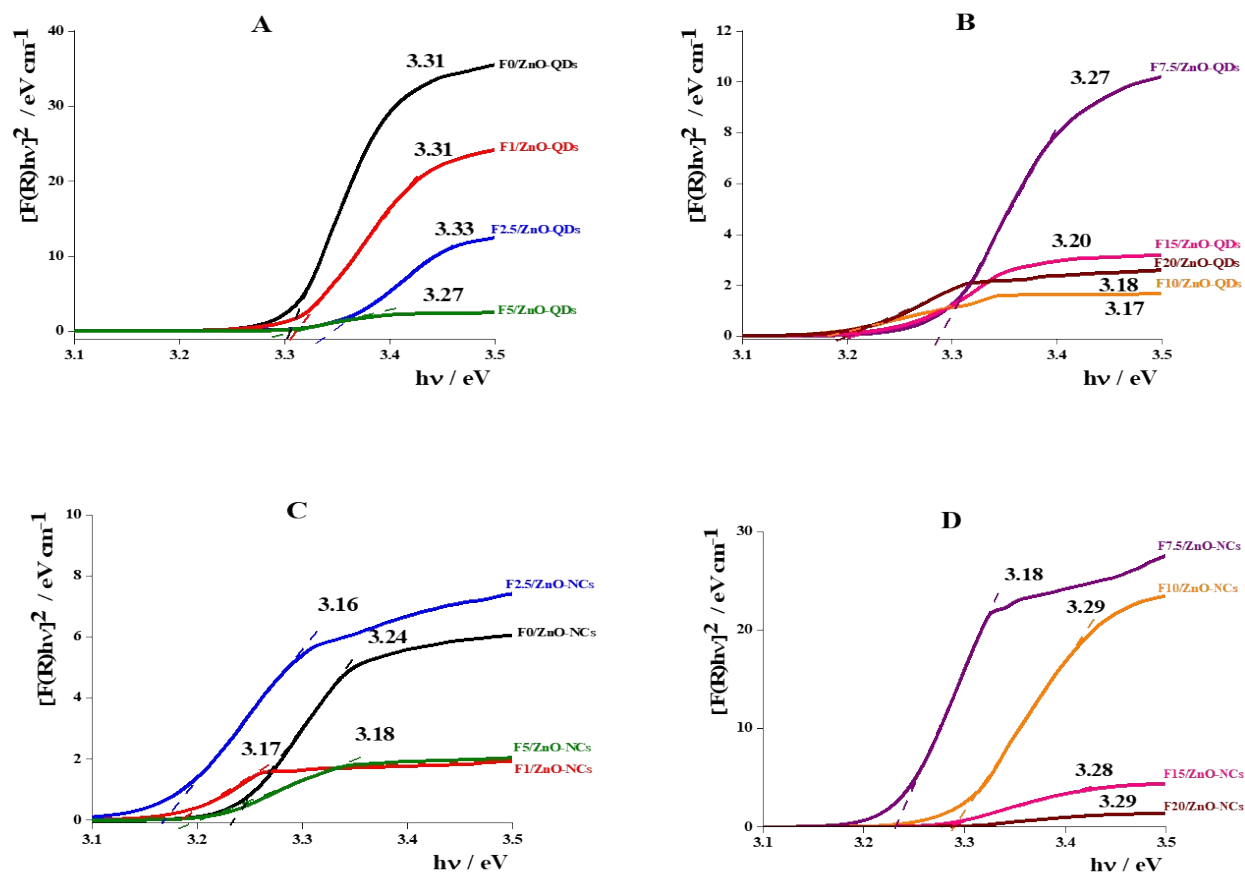

**Figure S6.** Tauc plot of undoped and F-doped ZnO-QDs as synthesized through the wet method (panels A and B) and the solvothermal method (panels C and D).

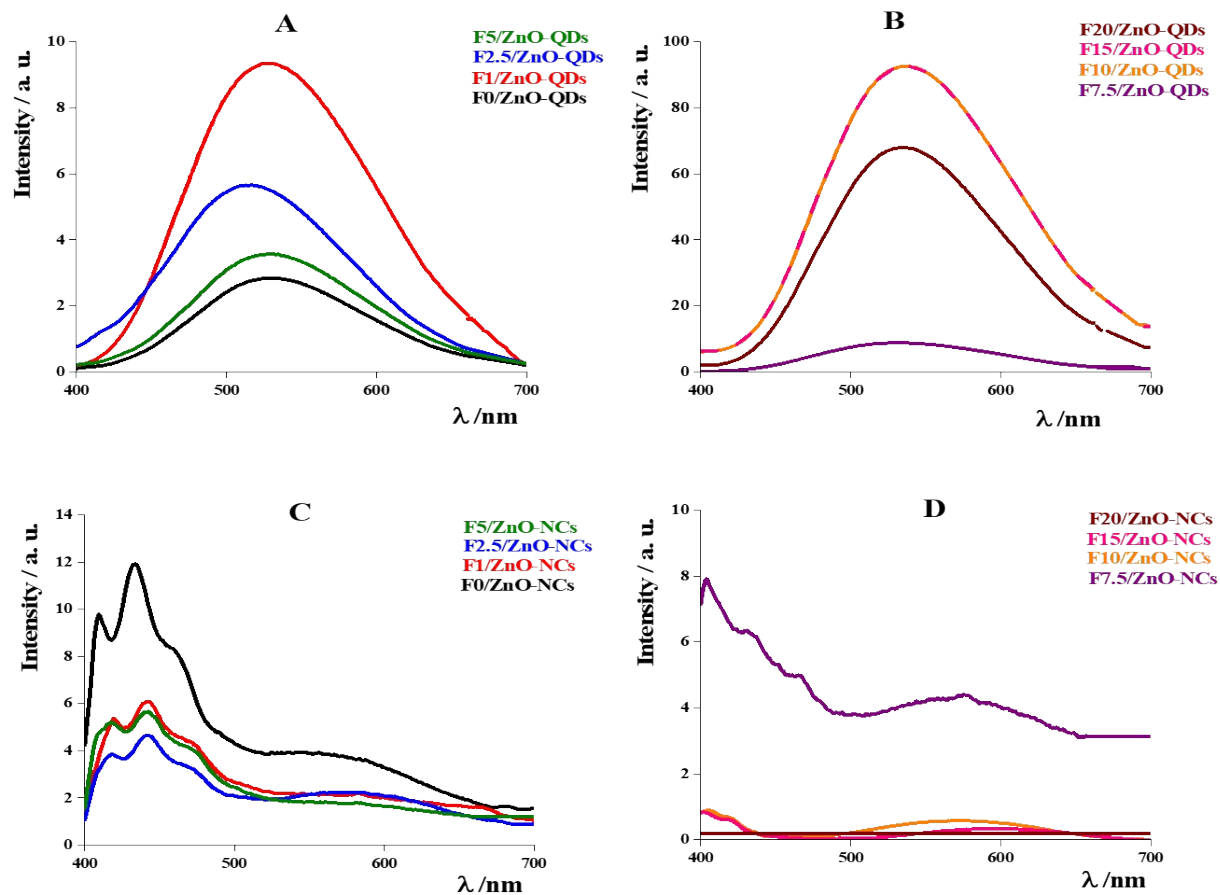

**Figure S7.** Fluorescence spectra of undoped and F-doped ZnO-QDs as synthesized through the wet method (panels A and B) and the solvothermal method (panels C and D).

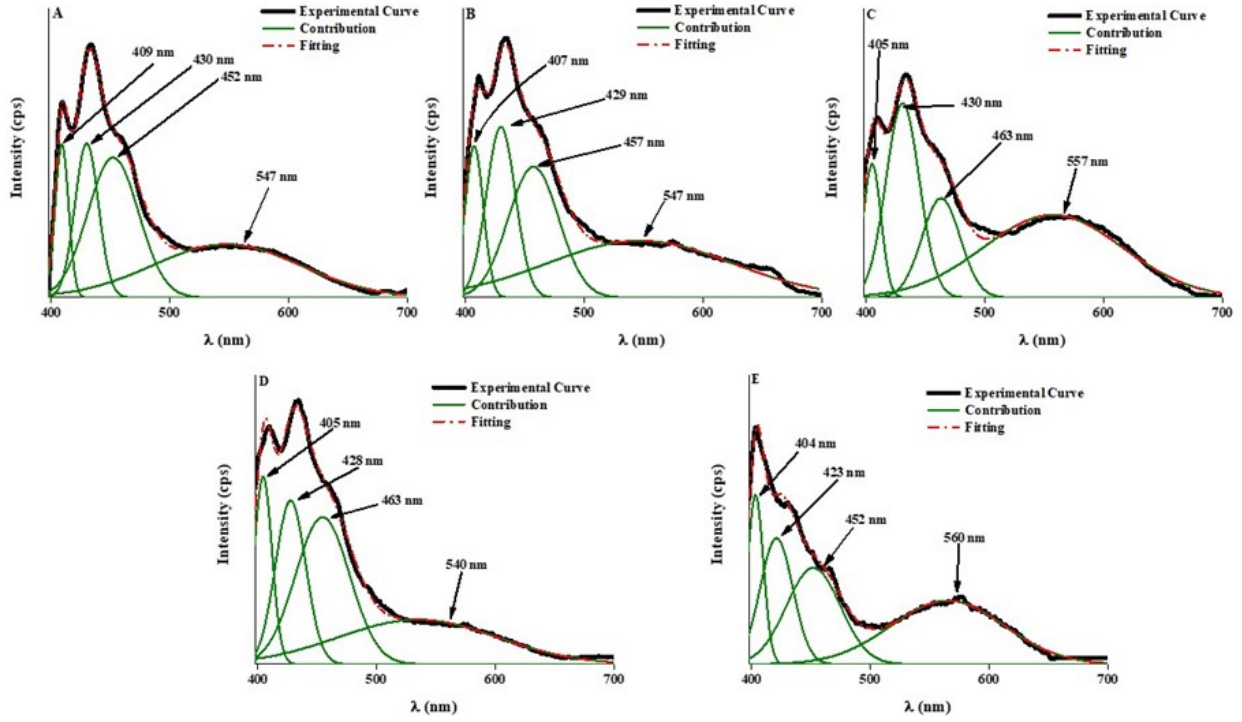

**Figure S8.** Fluorescence spectra deconvolution of F0/ZnO-NCs (A), F1/ZnO-NCs (B), F2.5/ZnO-NCs (C), F5/ZnO-NCs (D), and F7.5/ZnO-NCs (E).

### Relative quantum yield calculations

To quantitatively estimate the changes in fluorescence emission, the relative quantum yield ( $\Phi$ ) was determined. Considering the absorption and emission bands of all synthesized nanocrystals, quinine sulfate monohydrate was chosen as an appropriate standard for calculating  $\Phi$ . Specifically, the quantum yield  $\Phi$  for F/ZnO-QDs of the wet-precipitation set was calculated as:

$$\Phi = \left( \frac{A_s}{A} \right) \left( \frac{F}{F_s} \right) \left( \frac{n}{n_s} \right)^2 \phi_s \quad (1)$$

where  $A_s$  is the absorption of the standard,  $A$  is the absorption of the sample,  $F$  is the integral of the area below the fluorescence peak of the sample,  $F_s$  is the integral of the area below the emission peak of the standard,  $n$ , and  $n_s$  are the refractive indices of the solvent in which the sample and the standard are solubilized, respectively, and  $\phi_s$  is the quantum yield of the standard ( $\phi_s = 0.59$ ). On the other hand, for the F/ZnO-NCs of the solvothermal set, the relative quantum yield was calculated using the following equation:

$$\Phi = \left( \frac{m}{m_s} \right) \left( \frac{n^2}{n_s^2} \right) \phi_s \quad (2)$$

where  $m$  and  $m_s$  are the slope obtained from the linear fitting of the graph area of the fluorescence peaks versus absorbance of the sample and the standard, respectively, where the intercept is  $q=0$ . In this case, the  $\Phi$  was calculated considering two emission peaks of these nanocrystals: the first one at 430 nm and related to the zinc-based defects; and the second one at 550 nm and related to the oxygen defects (Table 3).
